# Supplementary material
Source: Springer Nature journal article supplement (https://www.springermedizin.de/resource/supplementary/13075_2011_3215_MOESM3_ESM.pdf/9694012)

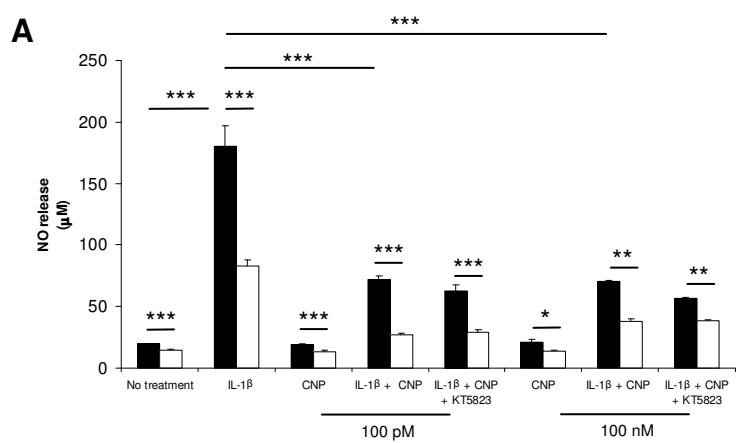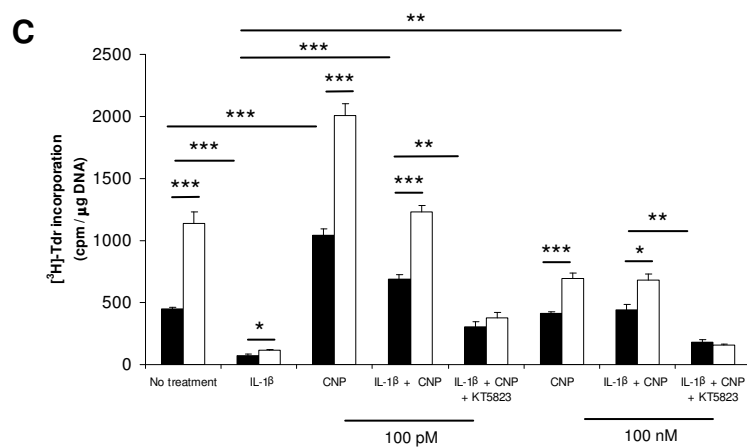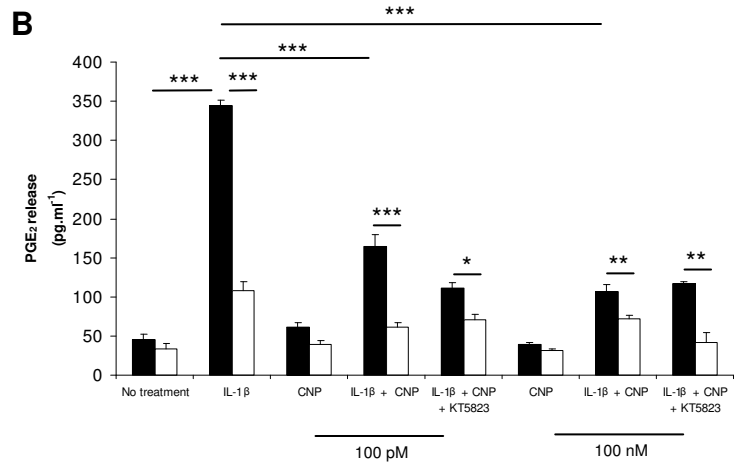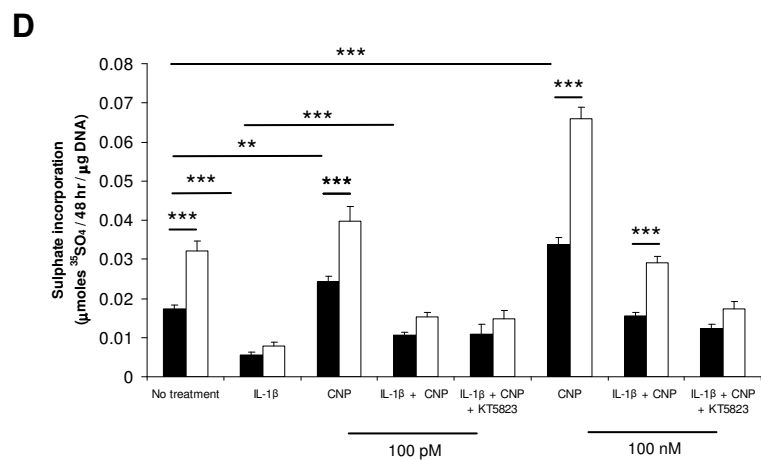

■ Unstrained □ Strained

Supplement: MOESM3 [file 9694012]
